# Supplementary figures and images for: RGS20 reduces glioma stemness and temozolomide resistance by intrinsically inhibiting the WNT/β-catenin signaling pathway
Source: Research Square preprint supplement (doi:10.21203/rs.3.rs-6110723/v1), 2025-03-04

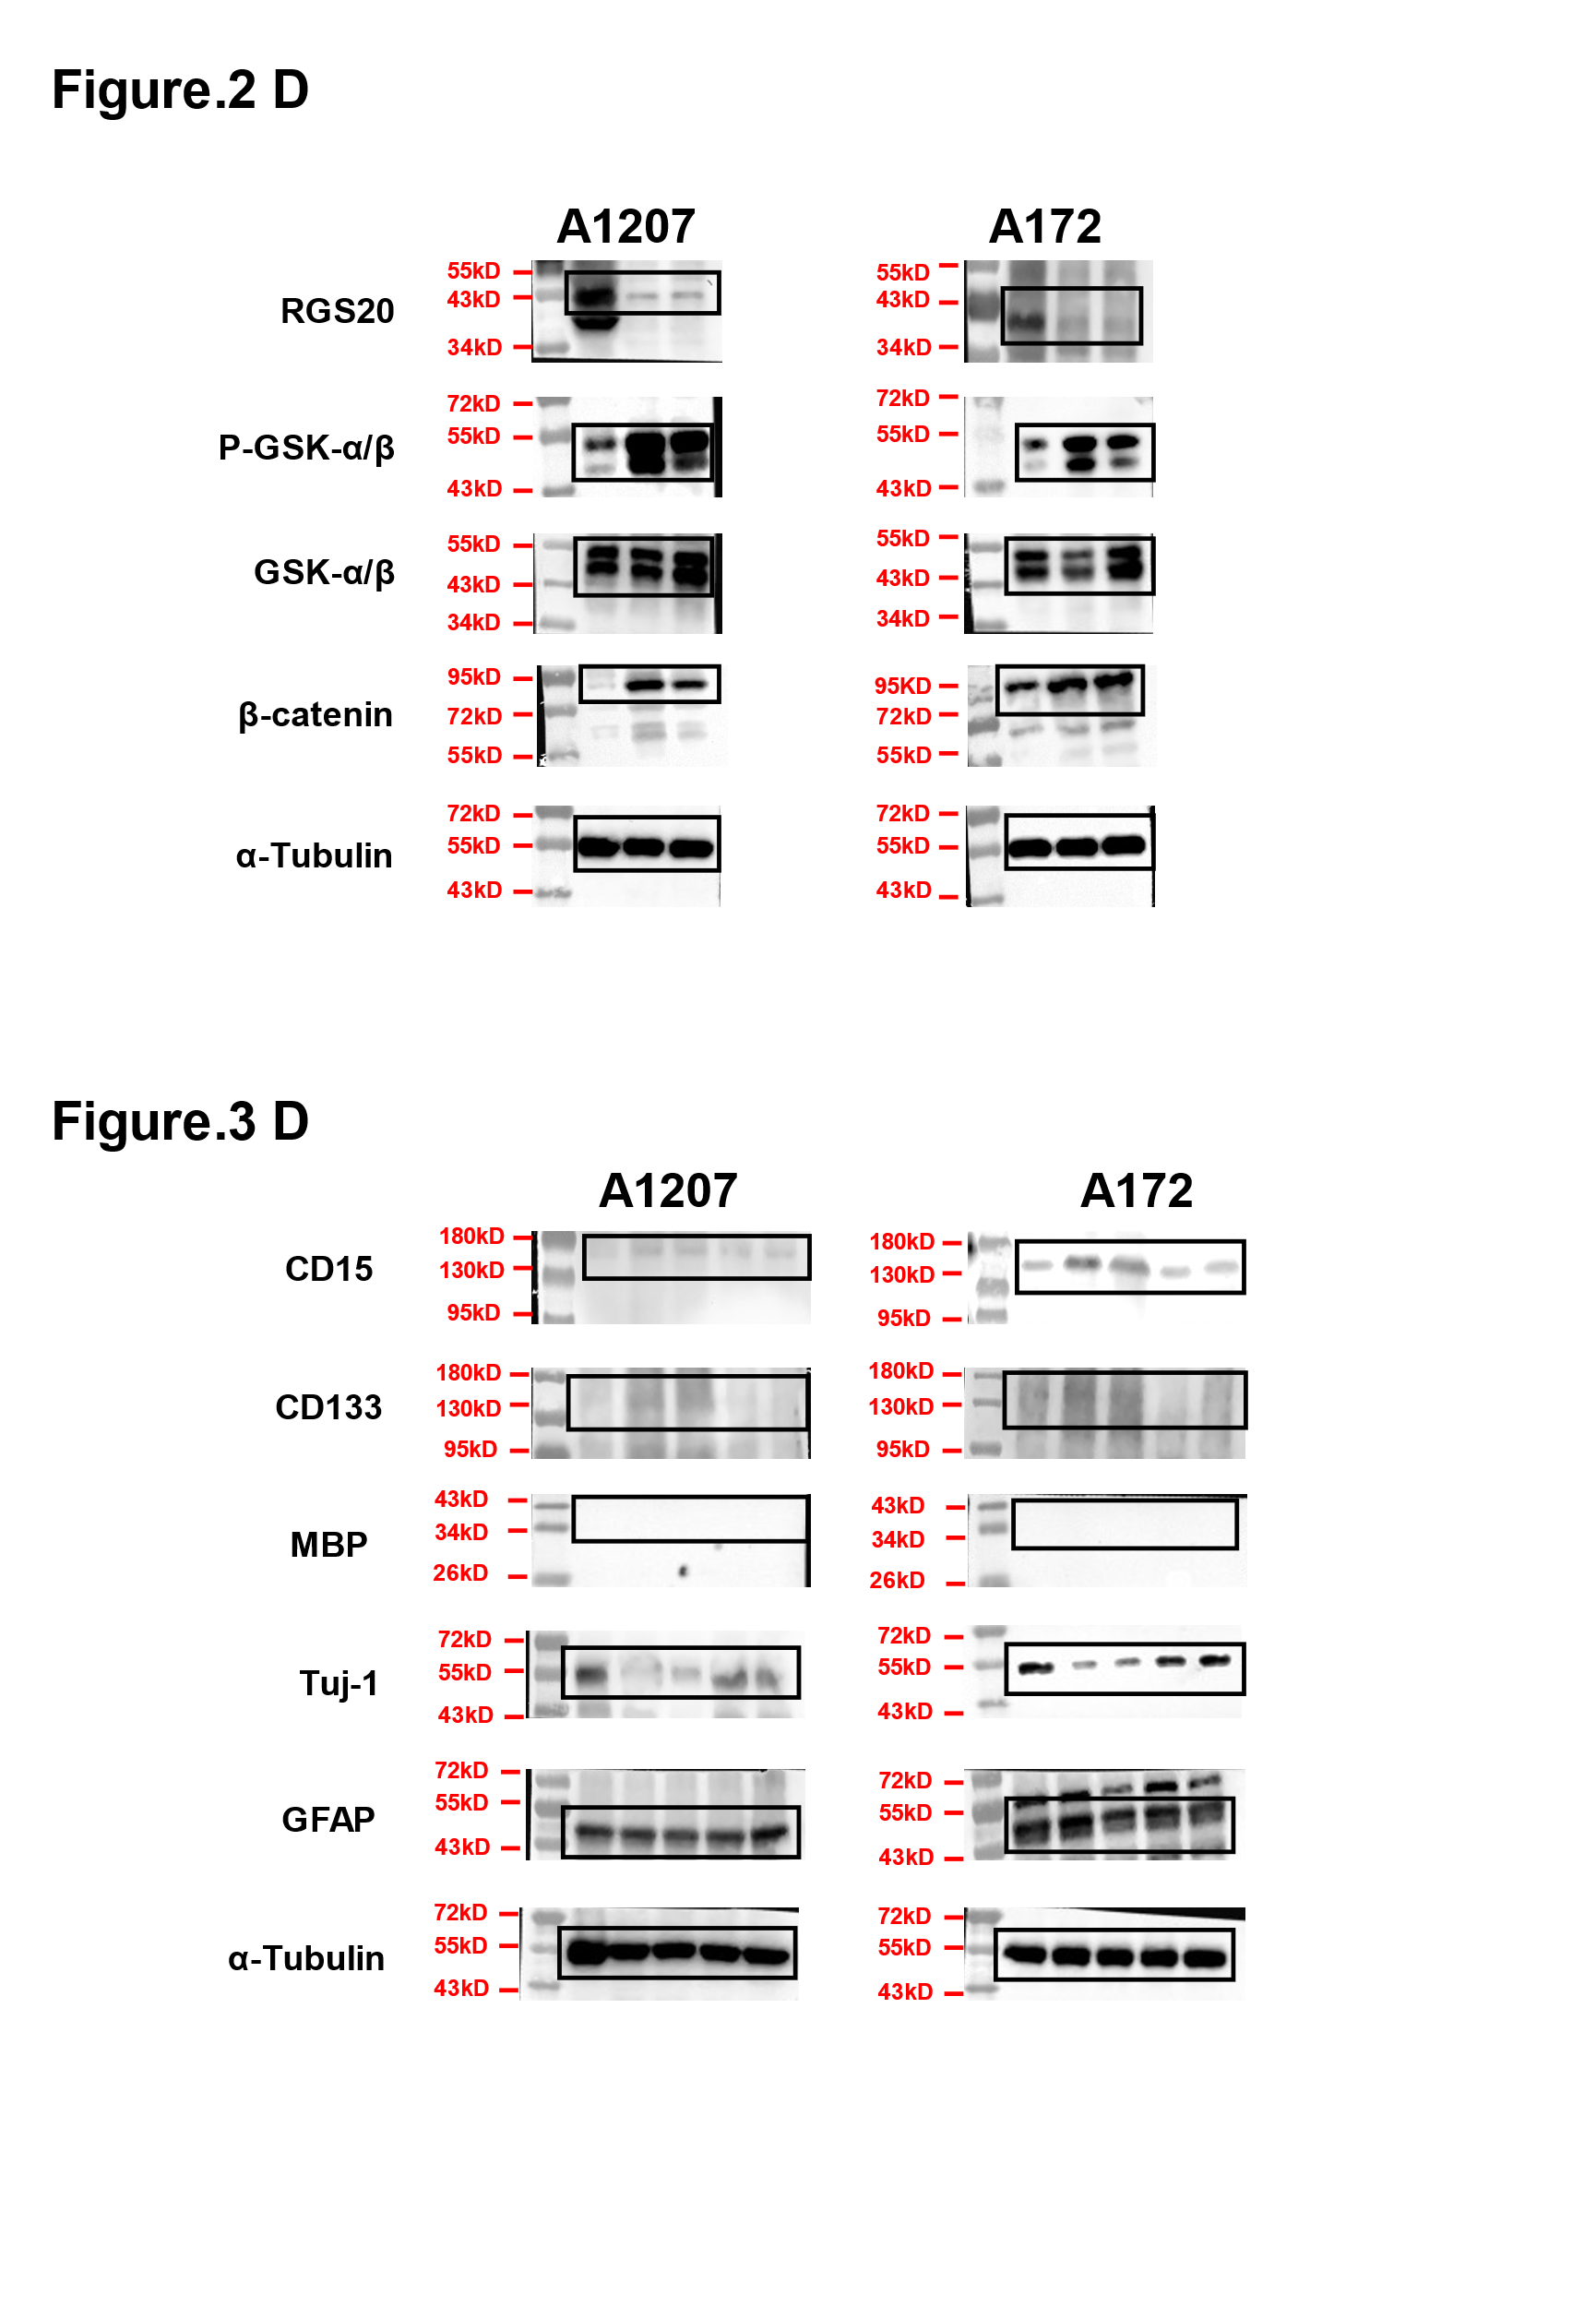


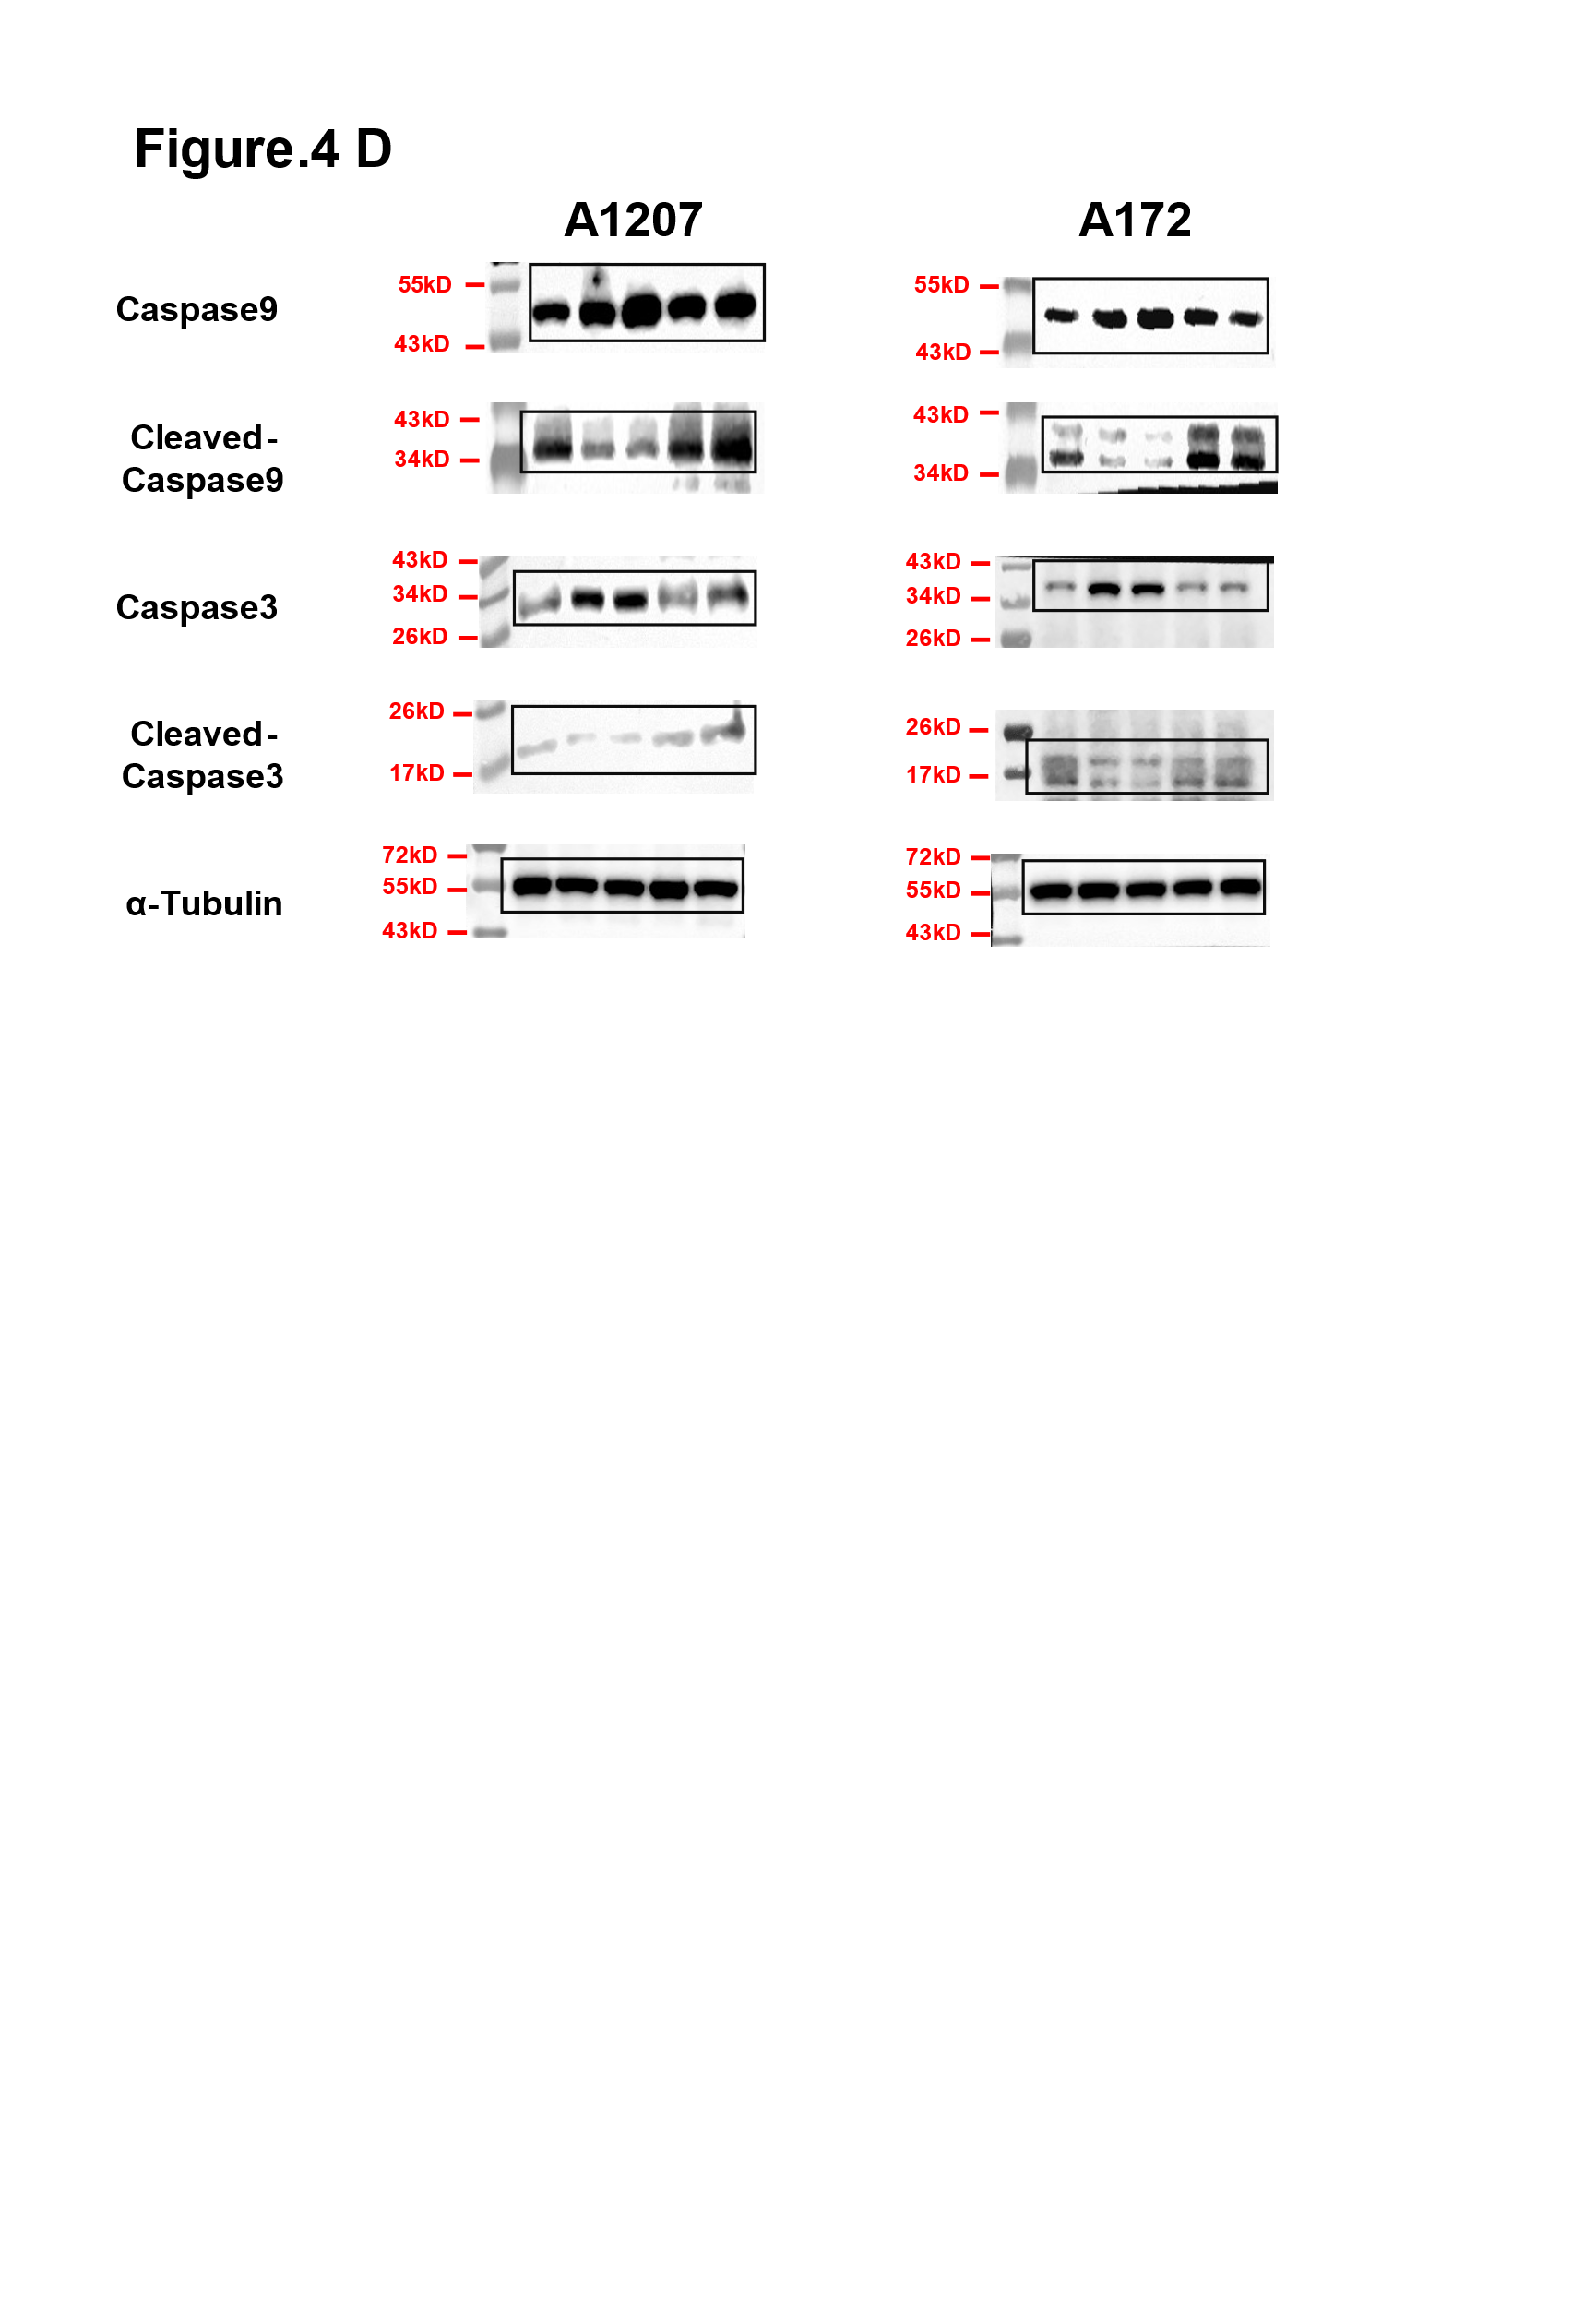

Supplement: Supplementary file 1 [file 6447f68a80d7fd51d8987ddc.docx]
